# Supplementary material for: Insight into endophytic microbial diversity in two halophytes and plant beneficial attributes of Bacillus swezeyi
Source: Front Microbiol. 2024 Aug 29;15:1447755. doi: 10.3389/fmicb.2024.1447755 (PMC11391308; doi:10.3389/fmicb.2024.1447755)
Supplement: Supplementary file 2 [file Table_1.XLSX]

## Sheet: Table S1
Table S1 Statistics of sequences from the two halophytes after filtering out low-quality and chimeric reads based on DADA2.
Sample id	input	filtered	percentage of input passed filter (%)	denoised	merged	percentage of input merged (%)	non-chimeric	percentage of input non-chimeric (%)	non-Chloroplast
AE1	151534	137093	90.47	136482	134949	89.06	133228	87.92	621
AE2	110610	102873	93.01	101994	100437	90.8	98802	89.32	915
AE3	195849	177592	90.68	176656	174817	89.26	171937	87.79	965
AT1	175938	159545	90.68	157942	153970	87.51	151193	85.94	7209
AT2	155981	140826	90.28	139532	136478	87.5	134279	86.09	5939
AT3	110330	100745	91.31	99973	98602	89.37	97144	88.05	2626

## Sheet: Table S2
Table S2 Endophytic bacterial community richness and diversity indices of the two halophytes.
Sample id	Observed_ASVs	Chao1	se.chao1	ACE	se.ACE	Shannon	Simpson	InvSimpson	Fisher	PD	Coverage
AE1	19	19	0	19	2.1	1.32	0.48	1.93	3.71	3.05	1
AE2	77	83.5	4.88	84.86	4.35	3.85	0.97	34.01	23.21	8.91	0.98
AE3	25	25.38	0.83	26.56	1.93	1.03	0.34	1.52	5.22	4.27	1
AT1	111	134.8	10.59	144.54	5.96	3.88	0.95	20.39	39.49	7.12	0.94
AT2	107	150.94	19.12	145.14	6.13	3.81	0.95	19.03	37.44	8.09	0.94
AT3	93	104.67	6.78	105.85	4.31	3.65	0.93	14.2	30.48	8.03	0.97

## Sheet: Table S3
Table S3 General features of the Bacillus swezeyi genomes
Plant sample sources	Genomes	Completeness	Contamination	Genome size (bp)	contigs	N50 (contigs)	Mean contig length (bp)	Longest contig (bp)	GC	Coding density	predicted genes
	Bacillus_swezeyi_NRRL_B-41282	99.24	0.41	4519724	78	131348	57943	427706	44.33	86.63	4372
AT	Bacillus_swezeyi_ES_91	99.14	0.14	4421313	61	241316	72480	678276	43.88	85.99	4537
AE	Bacillus_swezeyi_ES_88	99.14	0.14	4424295	54	249650	81931	719005	43.87	86	4539
AE	Bacillus_swezeyi_ES_822	99.14	0.14	4423323	54	249650	81913	678275	43.87	86.01	4541
AE	Bacillus_swezeyi_ES_82	99.14	0.14	4423813	54	249650	81922	719004	43.87	86	4536
AE	Bacillus_swezeyi_ES_819	99.14	0.14	4420959	63	241316	70173	678275	43.88	85.99	4537
	Bacillus_swezeyi_CH43_1T	99.14	0	4614405	18	895776	256355	995661	43.83	86.12	4628
	Bacillus_swezeyi_427	99.14	0	4791094	20	976199	239554	1901162	43.58	86.03	4864
	Bacillus_swezeyi_21	99.14	0.45	4762017	14	812528	340143	1154800	43.55	86.19	4780
	Bacillus_swezeyi_NRRL_B-41294	99.03	0.41	4516141	98	176167	46080	583790	44.32	86.59	4397
ANI value shared among the related Bacillus swezeyi strains
	ES_88	ES_82	Bacillus_swezeyi_CH43_1T	Bacillus_swezeyi_427	ES_819	Bacillus_swezeyi_NRRL_B-41294	Bacillus_swezeyi_NRRL_B-41282	ES_822	ES_91	Bacillus_swezeyi_21
ES_88	1	1	0.988156	0.987918	1	0.972897	0.972888	1	1	0.988219
ES_82	1	1	0.988176	0.987939	1	0.972916	0.972925	1	1	0.988206
Bacillus_swezeyi_CH43_1T	0.988156	0.988176	1	0.999805	0.988223	0.971369	0.971351	0.988191	0.988219	0.996723
Bacillus_swezeyi_427	0.987918	0.987939	0.999805	1	0.987981	0.97136	0.971356	0.987959	0.987977	0.99682
ES_819	1	1	0.988223	0.987981	1	0.972868	0.972898	1	1	0.988225
Bacillus_swezeyi_NRRL_B-41294	0.972897	0.972916	0.971369	0.97136	0.972868	1	0.999933	0.972932	0.972987	0.971265
Bacillus_swezeyi_NRRL_B-41282	0.972888	0.972925	0.971351	0.971356	0.972898	0.999933	1	0.972862	0.972892	0.971163
ES_822	1	1	0.988191	0.987959	1	0.972932	0.972862	1	1	0.988229
ES_91	1	1	0.988219	0.987977	1	0.972987	0.972892	1	1	0.98826
Bacillus_swezeyi_21	0.988219	0.988206	0.996723	0.99682	0.988225	0.971265	0.971163	0.988229	0.98826	1

## Sheet: Table S4
Table S4 List of genes and featured in Figure 8A in the main text.
Pathway		Gene	KO	Function	Bacillus_swezeyi_21	Bacillus_swezeyi_427	Bacillus_swezeyi_CH43_1T	Bacillus_swezeyi_NRRL_B-41282	Bacillus_swezeyi_NRRL_B-41294	ES_819	ES_822	ES_82	ES_88	ES_91
Glycolysis/Gluconeogenesis		LDH, ldh	K00016	L-lactate dehydrogenase	1	1	1	1	1	1	1	1	1	1
		frmA, ADH5, adhC	K00121	S-(hydroxymethyl)glutathione dehydrogenase / alcohol dehydrogenase	1	1	1	1	1	1	1	1	1	1
		ALDH	K00128	aldehyde dehydrogenase (NAD+)	2	2	2	2	2	2	2	2	2	2
		GAPDH, gapA	K00134	glyceraldehyde 3-phosphate dehydrogenase (phosphorylating)	2	2	2	2	2	2	2	2	2	2
		PDHA, pdhA	K00161	pyruvate dehydrogenase E1 component alpha subunit	1	1	1	1	1	1	1	1	1	1
		PDHB, pdhB	K00162	pyruvate dehydrogenase E1 component beta subunit	1	1	1	1	1	1	1	1	1	1
		DLD, lpd, pdhD	K00382	dihydrolipoamide dehydrogenase	3	3	3	3	3	3	3	3	3	3
		DLAT, aceF, pdhC	K00627	pyruvate dehydrogenase E2 component (dihydrolipoamide acetyltransferase)	2	2	2	2	2	2	2	2	2	2
		pfkA, PFK	K00850	6-phosphofructokinase 1	1	1	1	1	1	1	1	1	1	1
		PK, pyk	K00873	pyruvate kinase	1	1	1	1	1	1	1	1	1	1
		PGK, pgk	K00927	phosphoglycerate kinase	1	1	1	1	1	1	1	1	1	1
		pps, ppsA	K01007	pyruvate, water dikinase	0	0	0	0	0	0	0	0	0	0
		E3.2.1.86A, celF	K01222	6-phospho-beta-glucosidase	2	2	2	2	2	2	2	2	2	2
		E3.2.1.86B, bglA	K01223	6-phospho-beta-glucosidase	3	4	4	5	5	4	4	4	4	4
		E4.1.1.49, pckA	K01610	phosphoenolpyruvate carboxykinase (ATP)	1	1	1	1	1	1	1	1	1	1
		FBA, fbaA	K01624	fructose-bisphosphate aldolase, class II	1	1	1	1	1	1	1	1	1	1
		ENO, eno	K01689	enolase	1	1	1	1	1	1	1	1	1	1
		galM, GALM	K01785	aldose 1-epimerase	1	1	1	1	1	1	1	1	1	1
		TPI, tpiA	K01803	triosephosphate isomerase (TIM)	1	1	1	1	1	1	1	1	1	1
		GPI, pgi	K01810	glucose-6-phosphate isomerase	1	1	1	1	1	1	1	1	1	1
		ACSS1_2, acs	K01895	acetyl-CoA synthetase	3	3	3	3	3	3	3	3	3	3
		glpX	K02446	fructose-1,6-bisphosphatase II	1	1	1	1	1	1	1	1	1	1
		adhP	K13953	alcohol dehydrogenase, propanol-preferring	0	0	0	0	0	0	0	0	0	0
		yiaY	K13954	alcohol dehydrogenase	1	1	1	1	1	1	1	1	1	1
		glk	K25026	glucokinase	0	0	0	0	0	0	0	0	0	0
TCA cycle		mdh	K00024	malate dehydrogenase	1	1	1	1	1	1	1	1	1	1
		IDH1, IDH2, icd	K00031	isocitrate dehydrogenase	1	1	1	1	1	1	1	1	1	1
		PDHA, pdhA	K00161	pyruvate dehydrogenase E1 component alpha subunit	1	1	1	1	1	1	1	1	1	1
		PDHB, pdhB	K00162	pyruvate dehydrogenase E1 component beta subunit	1	1	1	1	1	1	1	1	1	1
		sdhA, frdA	K00239	succinate dehydrogenase / fumarate reductase, flavoprotein subunit	1	1	1	1	1	1	1	1	1	1
		sdhB, frdB	K00240	succinate dehydrogenase / fumarate reductase, iron-sulfur subunit	1	1	1	1	1	1	1	1	1	1
		sdhC, frdC	K00241	succinate dehydrogenase / fumarate reductase, cytochrome b subunit	1	1	1	1	1	1	1	1	1	1
		DLD, lpd, pdhD	K00382	dihydrolipoamide dehydrogenase	3	3	3	3	3	3	3	3	3	3
		DLAT, aceF, pdhC	K00627	pyruvate dehydrogenase E2 component (dihydrolipoamide acetyltransferase)	2	2	2	2	2	2	2	2	2	2
		DLST, sucB	K00658	2-oxoglutarate dehydrogenase E2 component (dihydrolipoamide succinyltransferase)	1	1	1	1	1	1	1	1	1	1
		E4.1.1.49, pckA	K01610	phosphoenolpyruvate carboxykinase (ATP)	1	1	1	1	1	1	1	1	1	1
		CS, gltA	K01647	citrate synthase	3	3	3	3	3	3	3	3	3	3
		E4.2.1.2B, fumC, FH	K01679	fumarate hydratase, class II	1	1	1	1	1	1	1	1	1	1
		ACO, acnA	K01681	aconitate hydratase	1	1	1	1	2	1	1	1	1	1
		sucD	K01902	succinyl-CoA synthetase alpha subunit	1	1	1	1	1	1	1	1	1	1
		sucC	K01903	succinyl-CoA synthetase beta subunit	1	1	1	1	1	1	1	1	1	1
		PC, pyc	K01958	pyruvate carboxylase	1	1	1	1	1	1	1	1	1	1
Pyruvate metabolism		LDH, ldh	K00016	L-lactate dehydrogenase	1	1	1	1	1	1	1	1	1	1
		mdh	K00024	malate dehydrogenase	1	1	1	1	1	1	1	1	1	1
		ME2, sfcA, maeA	K00027	malate dehydrogenase (oxaloacetate-decarboxylating)	4	4	4	4	4	4	4	4	4	4
		frmA, ADH5, adhC	K00121	S-(hydroxymethyl)glutathione dehydrogenase / alcohol dehydrogenase	1	1	1	1	1	1	1	1	1	1
		ALDH	K00128	aldehyde dehydrogenase (NAD+)	2	2	2	2	2	2	2	2	2	2
		E1.2.3.3, poxL	K00158	pyruvate oxidase	1	1	1	1	1	1	1	1	1	1
		PDHA, pdhA	K00161	pyruvate dehydrogenase E1 component alpha subunit	1	1	1	1	1	1	1	1	1	1
		PDHB, pdhB	K00162	pyruvate dehydrogenase E1 component beta subunit	1	1	1	1	1	1	1	1	1	1
		DLD, lpd, pdhD	K00382	dihydrolipoamide dehydrogenase	3	3	3	3	3	3	3	3	3	3
		ACAT, atoB	K00626	acetyl-CoA C-acetyltransferase	2	2	2	2	2	2	2	2	2	2
		DLAT, aceF, pdhC	K00627	pyruvate dehydrogenase E2 component (dihydrolipoamide acetyltransferase)	2	2	2	2	2	2	2	2	2	2
		PK, pyk	K00873	pyruvate kinase	1	1	1	1	1	1	1	1	1	1
		ackA	K00925	acetate kinase	1	1	1	1	1	1	1	1	1	1
		pps, ppsA	K01007	pyruvate, water dikinase	0	0	0	0	0	0	0	0	0	0
		gloB, gloC, HAGH	K01069	hydroxyacylglutathione hydrolase	2	2	2	2	2	3	3	3	3	3
		acyP	K01512	acylphosphatase	1	1	1	1	1	1	1	1	1	1
		E4.1.1.49, pckA	K01610	phosphoenolpyruvate carboxykinase (ATP)	1	1	1	1	1	1	1	1	1	1
		leuA, IMS	K01649	2-isopropylmalate synthase	1	1	1	1	1	1	1	1	1	1
		E4.2.1.2B, fumC, FH	K01679	fumarate hydratase, class II	1	1	1	1	1	1	1	1	1	1
		ACSS1_2, acs	K01895	acetyl-CoA synthetase	3	3	3	3	3	3	3	3	3	3
		accC	K01961	acetyl-CoA carboxylase, biotin carboxylase subunit	2	2	2	2	3	2	2	2	2	2
		accA	K01962	acetyl-CoA carboxylase carboxyl transferase subunit alpha	1	1	1	1	1	1	1	1	1	1
		accB, bccP	K02160	acetyl-CoA carboxylase biotin carboxyl carrier protein	2	2	2	2	2	2	2	2	2	2
		adhP	K13953	alcohol dehydrogenase, propanol-preferring	0	0	0	0	0	0	0	0	0	0
		yiaY	K13954	alcohol dehydrogenase	1	1	1	1	1	1	1	1	1	1
		yvgN	K23257	methylglyoxal/glyoxal reductase	1	1	1	1	1	1	1	1	1	1
Pentose phosphate pathway		PGD, gnd, gntZ	K00033	6-phosphogluconate dehydrogenase	2	2	2	2	2	2	2	2	2	2
		gdh	K00034	glucose 1-dehydrogenase	2	2	2	2	2	2	2	2	2	2
		G6PD, zwf	K00036	glucose-6-phosphate 1-dehydrogenase	1	1	1	1	1	1	1	1	1	1
		E2.2.1.1, tktA, tktB	K00615	transketolase	1	1	1	4	3	1	1	1	1	1
		E2.2.1.2, talA, talB	K00616	transaldolase	1	1	1	1	1	1	1	1	1	1
		pfkA, PFK	K00850	6-phosphofructokinase 1	1	1	1	1	1	1	1	1	1	1
		PRPS, prsA	K00948	ribose-phosphate pyrophosphokinase	1	1	1	1	1	1	1	1	1	1
		deoC, DERA	K01619	deoxyribose-phosphate aldolase	2	2	2	2	2	2	2	2	2	2
		FBA, fbaA	K01624	fructose-bisphosphate aldolase, class II	1	1	1	1	1	1	1	1	1	1
		rpe, RPE	K01783	ribulose-phosphate 3-epimerase	1	1	1	1	1	1	1	1	1	1
		rpiB	K01808	ribose 5-phosphate isomerase B	1	1	1	1	1	1	1	1	1	1
		GPI, pgi	K01810	glucose-6-phosphate isomerase	1	1	1	1	1	1	1	1	1	1
		glpX	K02446	fructose-1,6-bisphosphatase II	1	1	1	1	1	1	1	1	1	1
		gntK	K25031	gluconokinase	0	0	0	0	0	0	0	0	0	0
Oxidative phosphorylation	Complex II	sdhA,frdA	K00239	succinate dehydrogenase / fumarate reductase, flavoprotein subunit	1	1	1	1	1	1	1	1	1	1
		sdhB,frdB	K00240	succinate dehydrogenase / fumarate reductase, iron-sulfur subunit	1	1	1	1	1	1	1	1	1	1
		sdhC, frdC	K00241	succinate dehydrogenase / fumarate reductase, cytochrome b subunit	1	1	1	1	1	1	1	1	1	1
	Complex Ⅲ	MQCRA, qcrA, bfcA, petC	K03886	menaquinol-cytochrome c reductase iron-sulfur subunit	1	1	1	1	1	1	1	1	1	1
	Complex IV	cydA	K00425	cytochrome bd ubiquinol oxidase subunit I	2	2	2	2	2	2	2	2	2	2
		cydB	K00426	cytochrome bd ubiquinol oxidase subunit II	2	2	2	2	2	2	2	2	2	2
		COX10, ctaB, cyoE	K02257	heme o synthase	1	1	1	2	2	1	1	1	1	1
		COX15, ctaA	K02259	heme a synthase	1	1	1	1	1	1	1	1	1	1
		coxA, ctaD	K02274	cytochrome c oxidase subunit I	1	1	1	1	1	1	1	1	1	1
		coxB, ctaC	K02275	cytochrome c oxidase subunit II	1	1	1	1	1	1	1	1	1	1
		coxC, ctaE	K02276	cytochrome c oxidase subunit III	1	1	1	1	1	1	1	1	1	1
	Complex V	ATPF0A, atpB	K02108	F-type H+-transporting ATPase subunit a	1	1	1	1	1	1	1	1	1	1
		ATPF0B, atpF	K02109	F-type H+-transporting ATPase subunit b	1	1	1	1	1	1	1	1	1	1
		ATPF0C, atpE	K02110	F-type H+-transporting ATPase subunit c	1	1	1	1	1	1	1	1	1	1
		ATPF1A, atpA	K02111	F-type H+-transporting ATPase subunit alpha	1	1	1	1	1	1	1	1	1	1
		ATPF1B, atpD	K02112	F-type H+-transporting ATPase subunit beta	1	1	1	1	1	1	1	1	1	1
		ATPF1D, atpH	K02113	F-type H+-transporting ATPase subunit delta	1	1	1	1	1	1	1	1	1	1
		ATPF1E, atpC	K02114	F-type H+-transporting ATPase subunit epsilon	1	1	1	1	1	1	1	1	1	1
		ATPF1G, atpG	K02115	F-type H+-transporting ATPase subunit gamma	1	1	1	1	1	1	1	1	1	1
Homologous recombination		polA	K02335	DNA polymerase I	1	1	1	1	1	1	1	1	1	1
		dnaE	K02337	DNA polymerase III subunit alpha	4	4	4	1	1	3	3	3	3	3
		dnaN	K02338	DNA polymerase III subunit beta	2	2	1	1	1	1	1	1	1	1
		holA	K02340	DNA polymerase III subunit delta	1	1	1	1	1	1	1	1	1	1
		holB	K02341	DNA polymerase III subunit delta	1	1	1	1	1	1	1	1	1	1
		dnaQ	K02342	DNA polymerase III subunit epsilon	0	0	0	0	0	0	0	0	0	0
		dnaX	K02343	DNA polymerase III subunit gamma/tau	1	1	1	1	1	1	1	1	1	1
		ssb	K03111	single-strand DNA-binding protein	3	5	3	2	2	3	3	3	3	3
		ruvA	K03550	holliday junction DNA helicase RuvA	1	1	1	1	1	1	1	1	1	1
		ruvB	K03551	holliday junction DNA helicase RuvB	1	1	1	1	1	1	1	1	1	1
		recA	K03553	recombination protein RecA	1	1	1	1	1	1	1	1	1	1
		recD	K03581	exodeoxyribonuclease V alpha subunit	1	1	1	1	1	1	1	1	1	1
		recO	K03584	DNA repair protein RecO (recombination protein O)	1	1	1	1	1	1	1	1	1	1
		recF	K03629	DNA replication and repair protein RecF	1	1	1	1	1	1	1	1	1	1
		recG	K03655	ATP-dependent DNA helicase RecG	1	1	1	1	1	1	1	1	1	1
		priA	K04066	primosomal protein N' (replication factor Y) (superfamily II helicase)	1	1	1	1	1	1	1	1	1	1
		recR	K06187	recombination protein RecR	1	1	1	1	1	1	1	1	1	1
Galactose metabolism		galK	K00849	galactokinase [EC:2.7.1.6]	1	1	1	1	1	1	1	1	1	1
		pfkA, PFK	K00850	6-phosphofructokinase 1 [EC:2.7.1.11]	1	1	1	1	1	1	1	1	1	1
		UGP2, galU, galF	K00963	UTP--glucose-1-phosphate uridylyltransferase [EC:2.7.7.9]	2	2	2	2	2	2	2	2	2	2
		galT, GALT	K00965	UDPglucose--hexose-1-phosphate uridylyltransferase [EC:2.7.7.12]	1	1	1	1	1	1	1	1	1	1
		malZ	K01187	alpha-glucosidase [EC:3.2.1.20]	1	1	1	1	1	1	1	1	1	1
		galE, GALE	K01784	UDP-glucose 4-epimerase [EC:5.1.3.2]	5	5	5	5	5	5	5	5	5	5
		galM, GALM	K01785	aldose 1-epimerase [EC:5.1.3.3]	1	1	1	1	1	1	1	1	1	1
		melA	K07406	alpha-galactosidase [EC:3.2.1.22]	0	0	0	0	0	0	0	0	0	0
		glk	K25026	glucokinase [EC:2.7.1.2]	0	0	0	0	0	0	0	0	0	0
Nitrogen metabolism		gudB, rocG	K00260	glutamate dehydrogenase	1	1	1	1	1	1	1	1	1	1
		E1.4.1.4, gdhA	K00262	glutamate dehydrogenase (NADP+) [EC:1.4.1.4]	1	1	1	1	1	1	1	1	1	1
		gltB	K00265	glutamate synthase (NADPH) large chain [EC:1.4.1.13]	1	1	1	1	1	1	1	1	1	1
		gltD	K00266	glutamate synthase (NADPH) small chain [EC:1.4.1.13]	1	1	1	1	1	1	1	1	1	1
		ncd2, npd	K00459	nitronate monooxygenase [EC:1.13.12.16]	1	1	1	1	1	1	1	1	1	1
		cynT, can	K01673	carbonic anhydrase [EC:4.2.1.1]	2	2	2	2	2	2	2	2	2	2
		glnA, GLUL	K01915	glutamine synthetase [EC:6.3.1.2]	1	1	1	1	1	1	1	1	1	1
Sulfur metabolism		cysI	K00381	sulfite reductase (NADPH) hemoprotein beta-component [EC:1.8.1.2]	1	1	1	1	1	1	1	1	1	1
		cysH	K00390	phosphoadenosine phosphosulfate reductase	2	2	2	2	2	2	2	2	2	2
		cysE	K00640	serine O-acetyltransferase	2	2	2	1	1	1	1	1	1	1
		metA	K00651	homoserine O-succinyltransferase/O-acetyltransferase [EC:2.3.1.46 2.3.1.31]	1	1	1	1	1	1	1	1	1	1
		cysC	K00860	adenylylsulfate kinase [EC:2.7.1.25]	2	2	2	2	2	2	2	2	2	2
		sat, met3	K00958	sulfate adenylyltransferase [EC:2.7.7.4]	2	2	2	2	2	2	2	2	2	2
		cysK	K01738	cysteine synthase [EC:2.5.1.47]	2	2	2	2	2	2	2	2	2	2
		metB	K01739	cystathionine gamma-synthase [EC:2.5.1.48]	1	1	1	1	1	1	1	1	1	1
		nrnA	K06881	bifunctional oligoribonuclease and PAP phosphatase NrnA [EC:3.1.3.7 3.1.13.3]	1	1	1	1	1	1	1	1	1	1
		phsB	K08353	thiosulfate reductase electron transport protein	0	0	0	0	0	0	0	0	0	0
		ssuA	K15553	sulfonate transport system substrate-binding protein	0	0	0	0	0	0	0	0	0	0
		ssuC	K15554	sulfonate transport system permease protein	0	0	0	0	0	0	0	0	0	0
		ssuB	K15555	sulfonate transport system ATP-binding protein	0	0	0	0	0	0	0	0	0	0
		sqr	K17218	sulfide:quinone oxidoreductase [EC:1.8.5.4]	1	1	1	1	1	1	1	1	1	1
Phosphorus metabolism		phoD	K01113	Alkaline phosphatase D	3	3	3	4	4	3	3	3	3	3
		phoP	K07658	Alkaline phosphatase synthesis transcriptional regulatory protein PhoP	1	1	1	1	1	1	1	1	1	1
Amino acid metabolism		dat	K00824	D-alanine transaminase [EC:2.6.1.21]	1	1	1	1	1	1	1	1	1	1
		glsA, GLS	K01425	glutaminase [EC:3.5.1.2]	2	2	2	2	2	2	2	2	2	2
		lysA	K01586	diaminopimelate decarboxylase [EC:4.1.1.20]	1	1	1	1	1	1	1	1	1	1
		alr	K01775	alanine racemase [EC:5.1.1.1]	2	2	2	2	2	2	2	2	2	2
		murI	K01776	glutamate racemase [EC:5.1.1.3]	1	1	1	1	1	1	1	1	1	1
		dapF	K01778	diaminopimelate epimerase [EC:5.1.1.7]	1	1	1	1	1	1	1	1	1	1
		ddl	K01921	D-alanine-D-alanine ligase [EC:6.3.2.4]	1	1	1	1	1	1	1	1	1	1
		murD	K01925	UDP-N-acetylmuramoylalanine--D-glutamate ligase [EC:6.3.2.9]	1	1	1	1	1	1	1	1	1	1
		dltA	K03367	D-alanine--poly(phosphoribitol) ligase subunit 1 [EC:6.1.1.13]	1	1	1	1	1	1	1	1	1	1
		purQ	K23265	phosphoribosylformylglycinamidine synthase subunit PurQ / glutaminase [EC:6.3.5.3 3.5.1.2]	1	1	1	1	1	1	1	1	1	1
		racX, ygeA	K25316	amino-acid racemase [EC:5.1.1.10]	0	0	0	0	0	0	0	0	0	0
Nicotinate and nicotinamide metabolism		gabD	K00135	succinate-semialdehyde dehydrogenase / glutarate-semialdehyde dehydrogenase [EC:1.2.1.16 1.2.1.79 1.2.1.20]	1	1	1	1	1	1	1	1	1	1
		nadB	K00278	L-aspartate oxidase [EC:1.4.3.16]	1	1	1	1	1	1	1	1	1	1
		pncB, NAPRT1	K00763	nicotinate phosphoribosyltransferase [EC:6.3.4.21]	1	1	1	1	1	1	1	1	1	1
		nadC, QPRT	K00767	nicotinate-nucleotide pyrophosphorylase (carboxylating) [EC:2.4.2.19]	1	1	1	1	1	1	1	1	1	1
		ppnK, NADK	K00858	NAD+ kinase [EC:2.7.1.23]	2	2	2	2	2	2	2	2	2	2
		nadD	K00969	nicotinate-nucleotide adenylyltransferase [EC:2.7.7.18]	1	1	1	1	1	1	1	1	1	1
		nadE	K01916	NAD+ synthase	1	1	1	1	1	1	1	1	1	1
		punA, PNP	K03783	purine-nucleoside phosphorylase [EC:2.4.2.1]	1	1	1	1	1	1	1	1	1	1
		deoD	K03784	purine-nucleoside phosphorylase [EC:2.4.2.1]	1	1	1	1	1	1	1	1	1	1
		ushA	K11751	5'-nucleotidase / UDP-sugar diphosphatase [EC:3.1.3.5 3.6.1.45]	0	0	0	0	0	0	0	0	0	0
		npdA	K12410	NAD-dependent deacetylase [EC:2.3.1.286]	1	1	1	1	1	1	1	1	1	1
ABC and other transporters	Mineral and organic ion transporters	proV	K02000	glycine betaine/proline transport system ATP-binding protein	1	1	1	1	1	0	0	0	0	0
		proW	K02001	glycine betaine/proline transport system permease protein	1	1	1	1	1	0	0	0	0	0
		proX	K02002	glycine betaine/proline transport system substrate-binding protein	1	1	1	1	1	0	0	0	0	0
		modB	K02018	molybdate transport system permease protein	1	1	1	1	1	1	1	1	1	1
		modA	K02020	molybdate transport system substrate-binding protein	1	1	1	1	1	1	1	1	1	1
		opuC	K05845	osmoprotectant transport system substrate-binding protein	1	1	1	1	1	1	1	1	1	1
		opuBD	K05846	osmoprotectant transport system permease protein	2	2	2	2	2	2	2	2	2	2
		opuA	K05847	osmoprotectant transport system ATP-binding protein	1	1	1	1	1	1	1	1	1	1
		ssuA	K15553	sulfonate transport system substrate-binding protein	0	0	0	0	0	0	0	0	0	0
		ssuC	K15554	sulfonate transport system permease protein	0	0	0	0	0	0	0	0	0	0
		ssuB	K15555	sulfonate transport system ATP-binding protein	0	0	0	0	0	0	0	0	0	0
	Oligosaccharide, polyol, and lipid transporters	bmpA, bmpB, tmpC	K07335	basic membrane protein A and related proteins	0	0	0	0	0	0	0	0	0	0
		malK, mtlK, thuK	K10111	multiple sugar transport system ATP-binding protein	0	0	0	0	0	0	0	0	0	0
		msmE	K10117	raffinose/stachyose/melibiose transport system substrate-binding protein	0	0	0	1	1	1	1	1	1	1
		msmF	K10118	raffinose/stachyose/melibiose transport system permease protein	0	0	0	0	0	0	0	0	0	0
		ganP, mdxF	K15771	arabinogalactan oligomer / maltooligosaccharide transport system permease protein	1	1	1	1	1	1	1	1	1	1
		araQ	K17236	arabinooligosaccharide transport system permease protein	1	1	1	1	1	1	1	1	1	1
		nupB	K23535	general nucleoside transport system permease protein	0	0	0	0	0	0	0	0	0	0
		nupC	K23536	general nucleoside transport system permease protein	0	0	0	0	0	0	0	0	0	0
		nupA	K23537	general nucleoside transport system ATP-binding protein	0	0	0	0	0	0	0	0	0	0
	Monosaccharide transporters	msmX, msmK, malK, sugC, ggtA, msiK	K10112	multiple sugar transport system ATP-binding protein	1	1	1	1	1	1	1	1	1	1
		rbsB	K10439	ribose transport system substrate-binding protein	2	2	2	2	2	2	2	2	2	2
		rbsC	K10440	ribose transport system permease protein	1	1	1	1	1	1	1	1	1	1
		rbsA	K10441	ribose transport system ATP-binding protein	1	1	1	1	1	1	1	1	1	1
	Phosphate and amino acid transporters	pstB	K02036	phosphate transport system ATP-binding protein	2	2	2	2	2	2	2	2	2	2
		pstC	K02037	phosphate transport system permease protein	1	1	1	1	1	1	1	1	1	1
		pstA	K02038	phosphate transport system permease protein	1	1	1	1	1	1	1	1	1	1
		pstS	K02040	phosphate transport system substrate-binding protein	1	1	1	1	1	1	1	1	1	1
		tcyB, yecS	K10009	L-cystine transport system permease protein	2	2	2	2	2	2	2	2	2	2
	Peptide and nickel transporters	dppA	K12368	dipeptide transport system substrate-binding protein	0	0	0	0	0	0	0	0	0	0
		oppA, mppA	K15580	oligopeptide transport system substrate-binding protein	1	1	1	1	1	1	1	1	1	1
		oppB	K15581	oligopeptide transport system permease protein	1	1	1	1	1	1	1	1	1	1
		oppC	K15582	oligopeptide transport system permease protein	1	1	1	1	1	1	1	1	1	1
		oppD	K15583	oligopeptide transport system ATP-binding protein	1	1	1	1	1	1	1	1	1	1
	Metallic cation, iron-siderophore and vitamin B12 transporters	znuC	K09817	zinc transport system ATP-binding protein	2	1	1	1	1	1	1	1	1	1
		bioY	K03523	biotin transport system substrate-specific component	2	2	2	2	2	2	2	2	2	2
	ABC-2 and other transporters	lptB	K06861	lipopolysaccharide export system ATP-binding protein	0	0	0	0	0	0	0	0	0	0
	ABC-2-type components transporting function	ftsX	K09811	cell division transport system permease protein	1	1	1	1	1	1	1	1	1	1
		ftsE	K09812	cell division transport system ATP-binding protein	1	1	1	1	1	1	1	1	1	1
	ABCB Subfamily	efrA, efrE	K18887	ATP-binding cassette, subfamily B, multidrug efflux pump	0	0	0	0	0	0	0	0	0	0
		efrB, efrF	K18888	ATP-binding cassette, subfamily B, multidrug efflux pump	0	0	0	0	0	0	0	0	0	0
	ABCC subfamily	cydC	K16012	ATP-binding cassette, subfamily C, bacterial CydC	1	1	1	1	1	1	1	1	1	1
		cydD	K16013	ATP-binding cassette, subfamily C, bacterial CydD	1	1	1	1	1	1	1	1	1	1
Fatty acid degradation		frmA, ADH5, adhC	K00121	S-(hydroxymethyl)glutathione dehydrogenase / alcohol dehydrogenase [EC:1.1.1.284 1.1.1.1]	1	1	1	1	1	1	1	1	1	1
		ALDH	K00128	aldehyde dehydrogenase (NAD+) [EC:1.2.1.3]	2	2	2	2	2	2	2	2	2	2
		ACAT, atoB	K00626	acetyl-CoA C-acetyltransferase	2	2	2	2	2	2	2	2	2	2
		fadA, fadI	K00632	acetyl-CoA acyltransferase [EC:2.3.1.16]	1	1	1	1	1	1	1	1	1	1
		ACSL, fadD	K01897	long-chain acyl-CoA synthetase [EC:6.2.1.3]	3	3	3	3	3	3	3	3	3	3
		fadB	K13767	enoyl-CoA hydratase [EC:4.2.1.17]	2	2	2	2	2	2	2	2	2	2
		adhP	K13953	alcohol dehydrogenase, propanol-preferring [EC:1.1.1.1]	0	0	0	0	0	0	0	0	0	0
		yiaY	K13954	alcohol dehydrogenase [EC:1.1.1.1]	1	1	1	1	1	1	1	1	1	1
Flagellar assembly		flgC	K02388	flagellar basal-body rod protein FlgC	1	1	1	1	1	1	1	1	1	1
		flgD	K02389	flagellar basal-body rod modification protein FlgD	1	1	1	1	1	1	1	1	1	1
		flgE	K02390	flagellar hook protein FlgE	1	1	1	1	1	1	1	1	1	1
		flgK	K02396	flagellar hook-associated protein 1	1	1	1	1	1	1	1	1	1	1
		flgL	K02397	flagellar hook-associated protein 3 FlgL	1	1	1	1	1	1	1	1	1	1
		flhA	K02400	flagellar biosynthesis protein FlhA	1	1	1	1	1	1	1	1	1	1
		flhB	K02401	flagellar biosynthesis protein FlhB	1	1	1	1	1	1	1	1	1	1
		fliA, whiG	K02405	RNA polymerase sigma factor FliA	1	1	1	1	1	1	1	1	1	1
		fliC, hag	K02406	flagellin	1	1	1	1	1	1	1	1	1	1
		fliD	K02407	flagellar hook-associated protein 2	1	1	1	1	1	1	1	1	1	1
		fliF	K02409	flagellar M-ring protein FliF	1	1	1	1	1	1	1	1	1	1
		fliG	K02410	flagellar motor switch protein FliG	1	1	1	1	1	1	1	1	1	1
		fliI	K02412	flagellum-specific ATP synthase	1	1	1	1	1	1	1	1	1	1
		fliM	K02416	flagellar motor switch protein FliM	1	1	1	1	1	1	1	1	1	1
		fliN	K02417	flagellar motor switch protein FliN	1	1	1	1	1	1	1	1	1	1
		fliP	K02419	flagellar biosynthesis protein FliP	1	1	1	1	1	1	1	1	1	1
		fliQ	K02420	flagellar biosynthesis protein FliQ	1	1	1	1	1	1	1	1	1	1
		fliR	K02421	flagellar biosynthesis protein FliR	1	1	1	1	1	1	1	1	1	1
		fliS	K02422	flagellar secretion chaperone FliS	1	1	1	1	1	1	1	1	1	1
		motA	K02556	chemotaxis protein MotA	2	2	2	2	3	2	2	2	2	2
		motB	K02557	chemotaxis protein MotB	2	2	2	2	2	2	2	2	2	2
		rpoD	K03086	RNA polymerase primary sigma factor	1	1	1	1	1	1	1	1	1	1
Carbon fixation in photosynthetic organisms		mdh	K00024	malate dehydrogenase	1	1	1	1	1	1	1	1	1	1
		GAPDH, gapA	K00134	glyceraldehyde 3-phosphate dehydrogenase (phosphorylating)	2	2	2	2	2	2	2	2	2	2
		E2.2.1.1, tktA, tktB	K00615	transketolase	1	1	1	4	3	1	1	1	1	1
		PGK, pgk	K00927	phosphoglycerate kinase	1	1	1	1	1	1	1	1	1	1
		E4.1.1.49, pckA	K01610	phosphoenolpyruvate carboxykinase (ATP)	1	1	1	1	1	1	1	1	1	1
		FBA, fbaA	K01624	fructose-bisphosphate aldolase, class II	1	1	1	1	1	1	1	1	1	1
		rpe, RPE	K01783	ribulose-phosphate 3-epimerase	1	1	1	1	1	1	1	1	1	1
		TPI, tpiA	K01803	triosephosphate isomerase (TIM)	1	1	1	1	1	1	1	1	1	1
		rpiB	K01808	ribose 5-phosphate isomerase B	1	1	1	1	1	1	1	1	1	1
		glpX	K02446	fructose-1,6-bisphosphatase II	1	1	1	1	1	1	1	1	1	1
Carbon fixation pathways in prokaryotes		mdh	K00024	malate dehydrogenase	1	1	1	1	1	1	1	1	1	1
		IDH1, IDH2, icd	K00031	isocitrate dehydrogenase	1	1	1	1	1	1	1	1	1	1
		sdhA, frdA	K00239	succinate dehydrogenase / fumarate reductase, flavoprotein subunit	1	1	1	1	1	1	1	1	1	1
		sdhB, frdB	K00240	succinate dehydrogenase / fumarate reductase, iron-sulfur subunit	1	1	1	1	1	1	1	1	1	1
		sdhC, frdC	K00241	succinate dehydrogenase / fumarate reductase, cytochrome b subunit	1	1	1	1	1	1	1	1	1	1
		ACAT, atoB	K00626	cetyl-CoA C-acetyltransferase	2	2	2	2	2	2	2	2	2	2
		ackA	K00925	acetate kinase	1	1	1	1	1	1	1	1	1	1
		pps, ppsA	K01007	pyruvate, water dikinase	0	0	0	0	0	0	0	0	0	0
		folD	K01491	methylenetetrahydrofolate dehydrogenase (NADP+) / methenyltetrahydrofolate cyclohydrolase	1	1	1	1	1	1	1	1	1	1
		E4.2.1.2B, fumC, FH	K01679	fumarate hydratase, class II	1	1	1	1	1	1	1	1	1	1
		ACO, acnA	K01681	aconitate hydratase	1	1	1	1	2	1	1	1	1	1
		ACSS1_2, acs	K01895	acetyl-CoA synthetase	3	3	3	3	3	3	3	3	3	3
		sucD	K01902	succinyl-CoA synthetase alpha subunit	1	1	1	1	1	1	1	1	1	1
		sucC	K01903	succinyl-CoA synthetase beta subunit	1	1	1	1	1	1	1	1	1	1
		accC	K01961	acetyl-CoA carboxylase, biotin carboxylase subunit	2	2	2	2	3	2	2	2	2	2
		accA	K01962	acetyl-CoA carboxylase carboxyl transferase subunit alpha	1	1	1	1	1	1	1	1	1	1
		accB, bccP	K02160	acetyl-CoA carboxylase biotin carboxyl carrier protein	2	2	2	2	2	2	2	2	2	2
		MCEE, epi	K05606	methylmalonyl-CoA/ethylmalonyl-CoA epimerase	0	0	0	0	0	0	0	0	0	0
		CS, gltA	K01647	Citrate synthase	3	3	3	3	3	3	3	3	3	3
Methane metabolism		mdh	K00024	malate dehydrogenase	1	1	1	1	1	1	1	1	1	1
		serA, PHGDH	K00058	D-3-phosphoglycerate dehydrogenase / 2-oxoglutarate reductase	1	1	1	2	2	1	1	1	1	1
		frmA, ADH5, adhC	K00121	S-(hydroxymethyl)glutathione dehydrogenase / alcohol dehydrogenase	1	1	1	1	1	1	1	1	1	1
		fdoG, fdhF, fdwA	K00123	formate dehydrogenase major subunit	1	1	1	1	1	2	2	2	2	2
		glyA, SHMT	K00600	glycine hydroxymethyltransferase	1	1	1	1	1	1	1	1	1	1
		serC, PSAT1	K00831	phosphoserine aminotransferase	1	1	1	1	1	1	1	1	1	1
		pfkA, PFK	K00850	6-phosphofructokinase 1	1	1	1	1	1	1	1	1	1	1
		pps, ppsA	K01007	pyruvate, water dikinase	0	0	0	0	0	0	0	0	0	0
		FBA, fbaA	K01624	fructose-bisphosphate aldolase, class II	1	1	1	1	1	1	1	1	1	1
		ENO, eno	K01689	enolase	1	1	1	1	1	1	1	1	1	1
		ACSS1_2, acs	K01895	acetyl-CoA synthetase	3	3	3	3	3	3	3	3	3	3
		thrH	K02203	phosphoserine / homoserine phosphotransferase	0	0	0	0	0	0	0	0	0	0
		glpX	K02446	fructose-1,6-bisphosphatase II	1	1	1	1	1	1	1	1	1	1
Carbon cycle		coxL	K03520	Aerobic CO oxidation	0	0	0	0	0	0	0	0	0	0
		ubiX	K03186	Phenol => Benzoyl-CoA	1	1	1	1	1	1	1	1	1	1
		aminotransferase class I and II	K05825	Aminotransferase class I and II	0	0	0	0	0	0	0	0	0	0
		phosphoserine aminotransferase	K00831	Phosphoserine aminotransferase	1	1	1	1	1	1	1	1	1	1
		branched-chain amino acid aminotransferase/4-amino-4-deoxychorismate lyase	K00826	Branched-chain amino acid aminotransferase/4-amino-4-deoxychorismate lyase	2	2	2	2	2	2	2	2	2	2
		4-aminobutyrate aminotransferase and related aminotransferases	K00823	4-aminobutyrate aminotransferase and related aminotransferases	0	0	0	0	0	0	0	0	0	0
		aspB	K00812	Metabolism of organic sulfur | Cysteine <-> 3-mercaptopyruvate	2	2	2	2	2	2	2	2	2	2
		histidinol-phosphate/aromatic aminotransferase	K00817	Histidinol-phosphate/aromatic aminotransferase	1	1	1	1	1	1	1	1	1	1
		ornithine/acetylornithine aminotransferase	K00819	Ornithine/acetylornithine aminotransferase	1	1	1	1	1	1	1	1	1	1
		acetaldehyde => ethanol	K13954	Acetaldehyde => Ethanol	1	1	1	1	1	1	1	1	1	1
		ldh	K00016	Lactate utilization	1	1	1	1	1	1	1	1	1	1
		beta-xylosidase	K01198	Other oligosaccharide degrading	1	1	1	1	1	1	1	1	1	1
		hexosaminidase	K01207	Chitin degrading	1	1	1	1	1	1	1	1	1	1
		arabinosidase	K01209	Hemicullulose debranching	1	1	1	1	1	1	1	1	1	1
		mannan endo-1,4-beta-mannosidase	K01218	Endohemicellulases	1	1	1	1	1	1	1	1	1	1
		ack	K00925	Acetogenesis	1	1	1	1	1	1	1	1	1	1
		frmA	K00121	Formaldehyde oxidation	1	1	1	1	1	1	1	1	1	1
		fdoG	K00123	Formate oxidation	1	1	1	1	1	2	2	2	2	2
		acs	K01895	Acetate to acetyl-CoA	3	3	3	3	3	3	3	3	3	3
		alpha-amylase	K01176	Amylolytic enzymes	1	1	1	1	1	1	1	1	1	1
		bsdC	K01612	Phenol => Benzoyl-CoA	1	1	1	1	1	1	1	1	1	1
		pta	K00625	Acetogenesis	1	1	1	1	1	1	1	1	1	1
Nitrogen cycle		narH	K00371	Nitrate reduction	2	2	2	2	2	1	1	1	1	1
		narG	K00370	Nitrate reduction	2	2	2	2	2	1	1	1	1	1
		nirB	K00362	Nitrite reduction to ammonia	2	2	2	2	2	2	2	2	2	2
		nirD	K00363	Nitrite reduction to ammonia	1	1	1	1	1	1	1	1	1	1
Phosphorous cycle		pstA	K02038	phosphate transport system, membrane component	1	1	1	1	1	1	1	1	1	1
		pstB	K02036	phosphate transport system, ATP-binding component	2	2	2	2	2	2	2	2	2	2
		pstC	K02037	phosphate transport system, membrane component	1	1	1	1	1	1	1	1	1	1
		spoT	K01139	GTP diphosphokinase / guanosine-3',5'-bis(diphosphate) 3'-diphosphatase	0	0	0	0	0	0	0	0	0	0
		ugpQ	K01126	glycerophosphoryl diester phosphodiesterase	6	6	6	6	6	6	6	6	6	6
		ppaC	K15986	manganese-dependent inorganic pyrophosphatase	1	1	1	1	1	1	1	1	1	1
		pstS	K02040	phosphate transport system, periplasmic-binding component	1	1	1	1	1	1	1	1	1	1
		phoA	K01077	alkaline phosphatase	2	2	2	2	2	1	1	1	1	1
		pit	K03306	inorganic phosphate transporter	1	1	1	1	1	1	1	1	1	1
		PK	K00873	pyruvate kinase	1	1	1	1	1	1	1	1	1	1
		ppnK	K00858	NAD+ kinase	2	2	2	2	2	2	2	2	2	2
		ndk	K00940	nucleoside-diphosphate kinase	1	1	1	1	1	1	1	1	1	1
		phoD	K01113	alkaline phosphatase	3	3	3	4	4	3	3	3	3	3
		phoR	K07636	two-component system, OmpR family, phosphate regulon sensor histidine kinase PhoR	1	1	1	1	1	1	1	1	1	1
Surfur cycle		K17218	K17218	Dissimilatory sulfur metabolism | Sulfide oxidation	1	1	1	1	1	1	1	1	1	1
		K00958	K00958	Dissimilatory sulfur metabolism | Sulfate reduction	2	2	2	2	2	2	2	2	2	2
Biofilm formation		uvrY, gacA, varA	K07689	two-component system, NarL family, invasion response regulator UvrY	0	0	0	0	0	0	0	0	0	0
		fliA, whiG	K02405	RNA polymerase sigma factor FliA	1	1	1	1	1	1	1	1	1	1
		rpoN	K03092	RNA polymerase sigma-54 factor	1	1	1	1	1	1	1	1	1	1
		csrA	K03563	carbon storage regulator	1	1	1	1	1	1	1	1	1	1
		luxS	K07173	S-ribosylhomocysteine lyase	1	1	1	1	1	1	1	1	1	1
		hfq	K03666	host factor-I protein	1	1	1	1	1	1	1	1	1	1
		wecB	K01791	UDP-N-acetylglucosamine 2-epimerase (non-hydrolysing	2	2	2	2	2	2	2	2	2	2
		cysE	K00640	serine O-acetyltransferase	2	2	2	1	1	1	1	1	1	1
		crr	K02777	sugar PTS system EIIA component	1	1	1	1	1	1	1	1	1	1
		trpE	K01657	anthranilate synthase component I	1	1	1	1	1	1	1	1	1	1
		trpG	K01658	anthranilate synthase component II	0	0	0	0	0	0	0	0	0	0
		flgM	K02398	negative regulator of flagellin synthesis FlgM	1	1	1	1	1	1	1	1	1	1
		pelF	K21011	polysaccharide biosynthesis protein PelF	0	0	0	0	0	0	0	0	0	0
		crr	K02777	sugar PTS system EIIA component	1	1	1	1	1	1	1	1	1	1

## Sheet: Sheet5
Table S5 Salt stress related genes.
Metabolic process	Pathway	No.	Gene	KO	Bacillus_swezeyi_21	Bacillus_swezeyi_427	Bacillus_swezeyi_CH43_1T	Bacillus_swezeyi_NRRL_B-41282	Bacillus_swezeyi_NRRL_B-41294	ES_819	ES_822	ES_82	ES_88	ES_91
compatible solutes	glycerol	glycerol-3-phosphate dehydrogenase [EC:1.1.5.3]	glpA, glpD	K00111	1	1	1	1	1	1	1	1	1	1
compatible solutes	glycerol	glycerol kinase [EC:2.7.1.30]	glpK	K00864	1	1	1	1	1	1	1	1	1	1
compatible solutes	betaine	glycine betaine/proline transport system permease protein	proW	K02001	1	1	1	1	1	0	0	0	0	0
compatible solutes	betaine	betaine-aldehyde dehydrogenase	betB, gbsA	K00130	1	1	1	1	1	1	1	1	1	1
compatible solutes	choline	choline dehydrogenase	gbsB	K11440	1	1	1	1	1	1	1	1	1	1
compatible solutes	glycine	glycine betaine/proline transport system substrate-binding protein	proX	K02002	1	1	1	1	1	0	0	0	0	0
ion transporter	Na+	Na+:H+ antiporter, NhaC family	nhaC	K03315	2	2	2	2	2	2	2	2	2	2
ion transporter	Na+	NhaP-type Na+:H+ antiporter	nhaP	K03316	1	1	1	1	1	1	1	1	1	1
ion transporter	Na+	multicomponent Na+:H+ antiporter subunit A	mnhA, mrpA	K05565	1	1	1	1	1	1	1	1	1	1
ion transporter	Na+	multicomponent Na+:H+ antiporter subunit B	mnhB, mrpB	K05566	1	1	1	1	1	1	1	1	1	1
ion transporter	Na+	multicomponent Na+:H+ antiporter subunit C	mnhC, mrpC	K05567	1	1	1	1	1	1	1	1	1	1
ion transporter	Na+	multicomponent Na+:H+ antiporter subunit D	mnhD, mrpD	K05568	1	1	1	1	1	1	1	1	1	1
ion transporter	Na+	multicomponent Na+:H+ antiporter subunit E	mnhE, mrpE	K05569	1	1	1	1	1	1	1	1	1	1
ion transporter	Na+	multicomponent Na+:H+ antiporter subunit F	mnhF, mrpF	K05570	1	1	1	1	1	1	1	1	1	1
ion transporter	Na+	multicomponent Na+:H+ antiporter subunit G	mnhG, mrpG	K05571	1	1	1	1	1	1	1	1	1	1
ion transporter	Trk-type K+ uptake transporters	trk/ktr system potassium uptake protein	trkA	K03499	2	2	2	2	2	3	3	3	3	3
ion transporter	mechanosensitive ion channel	large conductance mechanosensitive channel	mscL	K03282	1	1	1	1	1	1	1	1	1	1
ion transporter	ABC-type multidrug transport systems	ATP-binding cassette, subfamily B, multidrug efflux pump	mdlA	K18889	1	1	1	1	1	1	1	1	1	1
ion transporter	ABC-type multidrug transport systems	ATP-binding cassette, subfamily B, multidrug efflux pump	mdlB	K18890	1	1	1	1	1	1	1	1	1	1
ion transporter	Kef-type K+:H+ antiporter	K+:H+ antiporter	KEA1_2_3, kefB, kefC	K03455	1	1	1	1	1	1	1	1	1	1

## Sheet: Sheet6
Table S6 Metabolic function of assembled genomes based on the KEGG annotation.
Metabolic process	Pathway		Function	Gene	KO	Bacillus_swezeyi_21	Bacillus_swezeyi_427	Bacillus_swezeyi_CH43_1T	Bacillus_swezeyi_NRRL_B-41282	Bacillus_swezeyi_NRRL_B-41294	ES_819	ES_822	ES_82	ES_88	ES_91
Carbohydrate degradation	beta-N-acetylhexosaminidase	beta-N-acetylhexosaminidase (nagZ)		nagZ	K01207	1	1	1	1	1	1	1	1	1	1
Carbohydrate degradation	glucuronate isomeras	glucuronate isomeras (uxaC)		uxaC	K01812	1	1	1	1	1	1	1	1	1	1
Carbohydrate degradation	beta-glucosidase	beta-glucosidase (bglX)		bglX	K05349	0	0	0	1	1	4	4	4	4	4
Carbohydrate degradation	pullulanase	pullulanase (pulA)		pulA	K01200	1	1	1	1	1	1	1	1	1	1
Carbon fixation	WLP	WLP (fhs)		fhs	K01938	1	1	1	1	1	1	1	1	1	1
Carbon fixation	WLP	WLP (folD)		folD	K01491	1	1	1	1	1	1	1	1	1	1
Carbon fixation	3HP	3HP (pccB)		pccB	K01966	1	1	1	1	1	1	1	1	1	1
Carbon fixation	3HP	3HP (accC)		accC	K01961	2	2	2	2	3	2	2	2	2	2
Carbon fixation	3HP	3HP (accA)		accA	K01962	1	1	1	1	1	1	1	1	1	1
Carbon fixation	3HP	3HP (accB)		accB	K01963	1	1	1	1	1	1	1	1	1	1
Carbon fixation	RGP	RGP (gcvT)		gcvT	K00605	1	1	1	1	1	1	1	1	1	1
Carbon fixation	RGP	RGP (gcvPA)		gcvPA	K00282	1	1	1	1	1	1	1	1	1	1
Carbon fixation	RGP	RGP (gcvPB)		gcvPB	K00283	1	1	1	1	1	1	1	1	1	1
Carbon fixation	RGP	RGP (pdhD)		pdhD	K00382	3	3	3	3	3	3	3	3	3	3
Oxidative phosphorylation	Cytochrome c oxidase aa3-type	Cytochrome c oxidase aa3-type (coxA)		coxA	K02274	1	1	1	1	1	1	1	1	1	1
Oxidative phosphorylation	Cytochrome c oxidase aa4-type	Cytochrome c oxidase aa4-type (coxB)		coxB	K02275	1	1	1	1	1	1	1	1	1	1
Oxidative phosphorylation	Cytochrome c oxidase aa5-type	Cytochrome c oxidase aa5-type (coxC)		coxC	K02276	1	1	1	1	1	1	1	1	1	1
Oxidative phosphorylation	Cytochrome c oxidase aa6-type	Cytochrome c oxidase aa6-type (coxD)		coxD	K02277	1	1	1	1	1	1	1	1	1	1
Oxidative phosphorylation	Cytochrome bd complex	Cytochrome bd complex (cydB)		cydB	K00426	2	2	2	2	2	2	2	2	2	2
Nitrogen metabolism	Nitrogen fixation	Nitrogen fixation (iscU, nifU)		iscU, nifU	K04488	1	1	1	1	1	1	1	1	1	1
Nitrogen metabolism	Nitrification	Nitrification (narG )	nitrate reductase / nitrite oxidoreductase, alpha subunit	narG	K00370	2	2	2	2	2	1	1	1	1	1
Nitrogen metabolism	Nitrification	Nitrification (narH )	nitrate reductase / nitrite oxidoreductase, beta subunit	narH	K00371	2	2	2	2	2	1	1	1	1	1
Nitrogen metabolism	Nitrification	Nitrification (hmp )	nitric oxide dioxygenase	hmp	K05916	2	2	2	1	1	3	3	3	3	3
Nitrogen metabolism	Denitrification	Denitrification (narG )	nitrate reductase / nitrite oxidoreductase, alpha subunit	narG	K00370	2	2	2	2	2	1	1	1	1	1
Nitrogen metabolism	Denitrification	Denitrification (narH )	nitrate reductase / nitrite oxidoreductase, beta subunit	narH	K00371	2	2	2	2	2	1	1	1	1	1
Nitrogen metabolism	Denitrification	Denitrification (narI )	nitrate reductase gamma subunit	narI	K00374	2	2	2	2	2	1	1	1	1	1
Nitrogen metabolism	Denitrification	Denitrification (norB )	nitric oxide reductase subunit B	norB	K04561	1	1	1	1	1	1	1	1	1	1
Nitrogen metabolism	Assimilatory nitrate reduction	Assimilatory nitrate reduction (nasA )	assimilatory nitrate reductase catalytic subunit	nasA	K00372	1	1	1	1	1	1	1	1	1	1
Nitrogen metabolism	Dissimilatory nitrate reduction	Dissimilatory nitrate reduction (narG )	nitrate reductase / nitrite oxidoreductase, alpha subunit	narG	K00370	2	2	2	2	2	1	1	1	1	1
Nitrogen metabolism	Dissimilatory nitrate reduction	Dissimilatory nitrate reduction (narH )	nitrate reductase / nitrite oxidoreductase, beta subunit	narH	K00371	2	2	2	2	2	1	1	1	1	1
Nitrogen metabolism	Dissimilatory nitrate reduction	Dissimilatory nitrate reduction (narI )	nitrate reductase gamma subunit	narI	K00374	2	2	2	2	2	1	1	1	1	1
Nitrogen metabolism	Dissimilatory nitrate reduction	Dissimilatory nitrate reduction (nirB )	nitrite reductase (NADH) large subunit	nirB	K00362	2	2	2	2	2	2	2	2	2	2
Nitrogen metabolism	Dissimilatory nitrate reduction	Dissimilatory nitrate reduction (nirD )	nitrite reductase (NADH) small subunit	nirD	K00363	1	1	1	1	1	1	1	1	1	1
Sulfur metabolism	Assimilatory sulfate reduction	Assimilatory sulfate reduction (sat, met3 )	sulfate adenylyltransferase	sat, met3	K00958	2	2	2	2	2	2	2	2	2	2
Sulfur metabolism	Assimilatory sulfate reduction	Assimilatory sulfate reduction (cysC )	adenylylsulfate kinase	cysC	K00860	2	2	2	2	2	2	2	2	2	2
Sulfur metabolism	Assimilatory sulfate reduction	Assimilatory sulfate reduction (cysH )	phosphoadenosine phosphosulfate reductase	cysH	K00390	2	2	2	2	2	2	2	2	2	2
Sulfur metabolism	Assimilatory sulfate reduction	Assimilatory sulfate reduction (cysJ )	sulfite reductase (NADPH) flavoprotein alpha-component	cysJ	K00380	1	1	1	1	1	1	1	1	1	1
Sulfur metabolism	Assimilatory sulfate reduction	Assimilatory sulfate reduction (cysI )	sulfite reductase (NADPH) hemoprotein beta-component	cysI	K00381	1	1	1	1	1	1	1	1	1	1
Sulfur metabolism	Dissimilatory sulfate reduction and oxidation	Dissimilatory sulfate reduction and oxidation (sat, met3 )	sulfate adenylyltransferase	sat, met3	K00958	2	2	2	2	2	2	2	2	2	2
IAA pathway	IAM	IAM (amiE )	amidase	amiE	K01426	0	0	0	1	1	0	0	0	0	0
IAA pathway	IPyA	IPyA (ALDH )	aldehyde dehydrogenase (NAD+)	ALDH	K00128	2	2	2	2	2	2	2	2	2	2

## Sheet: Sheet7
Table S7 Phenotypic and physiological characteristics of Bacillus swezeyi determined by Biolog GEN III, API 20NE, API ZYM, reagent reaction
		ES 822	ES 819	ES 82	ES 88	ES 91
API 20 NE	NO3——NO2	+	+	+	+	+
	NO3——N2	-	-	-	+	+
	ferment glucose	+	+	+	+	+
	arginine dihydrolase	+	+	+	+	+
	Urease	+	+	+	+	+
	ESC β-Glucosidase	+	+	+	+	+
	GEL hydrolyse gelatin	+	+	+	+	+
	PNPG β-Galactosidase	+	+	+	+	+
	[GLU] Glucose assimilation	+	+	+	+	+
	[ARA] Arabinose assimilation	+	+	+	+	+
	[MNE] Mannose assimilation	+	+	+	+	+
	[MAN] Mannitol assimilation	+	+	+	+	+
	[NAG] N-acetyl-β-glucosamine assimilation	+	+	+	+	+
	[MAL] Maltose assimilation	+	+	+	+	+
	[MAL] Maltose assimilation	+	+	+	+	+
	[CAP] capric acid	-	-	-	-	-
	[ADI] adipic acid	-	-	-	-	-
	[MLT] malic acid	+	+	+	+	+
	[CIT] trisodium citrate	+	+	+	+	+
	[PAC] phenylacetic acid	-	-	-	-	-
API ZYM	Alkaline phosphatase	+	+	+	+	+
	(C4) Esterase	+	+	+	+	+
	(C8) Esterase lipase	+	+	+	+	-
	(C14) Lipase	-	-	-	-	-
	Leucine arylamidase	+	-	-	-	-
	Valine arylamidase	+	-	-	-	-
	Cystine arylamidase	+	-	-	-	-
	Trypsin	+	-	-	-	-
	Chymotrypsin	+	-	-	-	-
	Acid phosphatase	+	+	+	+	-
	Naphthol-AS-BI-phosphohydrolase	+	+	+	+	+
	α-Galactosidase	-	-	-	-	-
	β-Galactosidase	-	-	-	-	-
	β-glucuronidase	-	-	-	-	-
	α-Glucosidase	-	-	-	-	-
	β-Glucosidase	-	-	-	+	-
	N-acetyl-β-glucosaminidase	-	-	-	+	-
	α-Mannosidase	-	-	-	-	-
	β-Mannosidase	-	-	-	-	-
Biolog Gen Ⅲ	Dextrin	+	+	+	+	+
	D-Maltose	+	+	+	+	+
	D-Trehalose	+	+	+	+	-
	D-Cellobiose	+	+	+	+	+
	Gentiobiose	+	+	+	+	+
	Sucrose	+	+	+	+	+
	D-Turanose	+	+	+	+	-
	Stachyose	-	-	+	-	-
	Positive Control	+	+	+	+	+
	pH 6	+	+	+	+	+
	pH 5	+	+	+	-	-
	D-Raffinose	+	+	+	+	+
	α-D-Lactose	+	+	+	+	+
	D-Melibiose	+	+	+	+	+
	β-Methyl-D-Glucoside	+	+	+	+	+
	D-Salicin	+	+	+	+	+
	N-Acetyl-D-Glucosamine	+	+	+	+	+
	N-Acetyl-β-DMannosamine	+	+	+	+	+
	N-Acetyl-D-Galactosamine	-	-	-	+	+
	N-AcetylNeuraminic Acid	-	-	-	+	+
	1% NaCl	+	+	+	-	-
	4% NaCl	+	+	+	-	-
	8% NaCl	+	+	+	-	-
	α-D-Glucose	+	+	+	-	-
	D-Mannose	+	+	+	-	-
	D-Fructose	+	+	+	-	-
	D-Galactose	+	+	+	-	+
	3-Methyl Glucose	+	+	+	-	-
	D-Fucose	+	+	+	-	-
	L-Fucose	+	+	+	+	+
	L-Rhamnose	+	+	+	+	+
	Inosine	+	+	+	+	+
	1% Sodium Lactate	+	+	+	+	+
	Fusidic Acid	+	-	-	+	+
	D-Serine	+	+	+	+	+
	D-Sorbitol	+	+	+	-	-
	D-Mannitol	+	+	+	+	+
	D-Arabitol	+	-	+	-	-
	myo-Inositol	+	+	+	+	+
	Glycerol	+	+	+	+	+
	D-Glucose-6-PO4	+	+	+	-	-
	D-Fructose-6-PO4	-	+	-	+	+
	D-Aspartic Acid	+	+	+	+	+
	D-Serine	-	-	-	+	+
	Troleandomycin	+	-	-	+	+
	Rifamycin SV	+	-	-	+	+
	Minocycline	+	-	+	+	+
	Gelatin	+	+	+	-	-
	Glycyl-L-Proline	+	+	+	-	-
	L-Alanine	+	+	+	-	-
	L-Arginine	+	+	+	-	-
	L-Aspartic Acid	+	+	+	-	-
	L-Glutamic Acid	+	+	+	-	-
	L-Histidine	+	-	+	-	-
	L-Pyroglutamic Acid	+	+	+	+	+
	L-Serine	+	+	+	+	+
	Lincomycin	+	-	+	-	-
	Guanidine HCl	+	+	+	+	+
	Niaproof 4	-	-	-	+	+
	Pectin	+	+	+	+	+
	D-Galacturonic Acid	+	+	+	-	-
	L-Galactonic Acid Lactone	+	+	+	+	+
	D-Gluconic Acid	+	+	+	+	+
	D-Glucuronic Acid	+	-	+	+	+
	Glucuronamide	+	+	+	-	-
	Mucic Acid	+	+	+	-	-
	Quinic Acid	-	-	-	-	+
	D-Saccharic Acid	+	+	+	+	+
	Vancomycin	-	-	-	+	+
	Tetrazolium Violet	-	-	+	+	+
	Tetrazolium Blue	-	-	-	+	+
	p-Hydroxy-Phenylacetic Acid	-	-	-	+	+
	Methyl Pyruvate	+	+	+	+	+
	D-Lactic Acid Methyl Ester	-	-	-	+	+
	L-Lactic Acid	+	+	+	-	-
	Citric Acid	+	+	+	-	-
	α-Keto-Glutaric Acid	+	+	+	+	+
	D-Malic Acid	+	+	+	+	+
	L-Malic Acid	+	+	+	+	+
	Bromo-Succinic Acid	+	+	+	+	+
	Nalidixic Acid	+	+	+	+	-
	Lithium Chloride	+	+	+	+	+
	Potassium Tellurite	+	+	+	+	-
	Tween 40	+	+	+	+	+
	γ-Amino-ButryricAcid	+	+	+	+	+
	α-Hydroxy-Butyric Acid	+	+	+	+	+
	β-Hydroxy-D,LButyricAcid	+	-	+	-	-
	α-Keto-Butyric Acid	+	+	+	+	+
	Acetoacetic Acid	+	+	+	+	+
	Propionic Acid	+	+	+	+	+
	Acetic Acid	+	+	+	+	+
	Formic Acid	+		+	+	+
	Aztreonam	+	+	+	+	+
	Sodium Butyrate	+	+	+	+	+
	Sodium Bromate	+	+	+	-	-
